# Supplementary material for: Role of Nrf2 Nucleus Translocation in Beauvericin-Induced Cell Damage in Rat Hepatocytes
Source: MDPI journal article supplement (doi:10.3390/toxins14060367), 2022-05-25
Supplement: s1 [file s1]

Article

# Role of Nrf2 Nucleus Translocation in Beauvericin-Induced Cell Damage in Rat Hepatocytes

Jiabin Shi, Yaling Wang, Wenlin Xu, Guodong Cai, Hui Zou, Jianhong Gu, Yan Yuan, Zongping Liu and Jianchun Bian

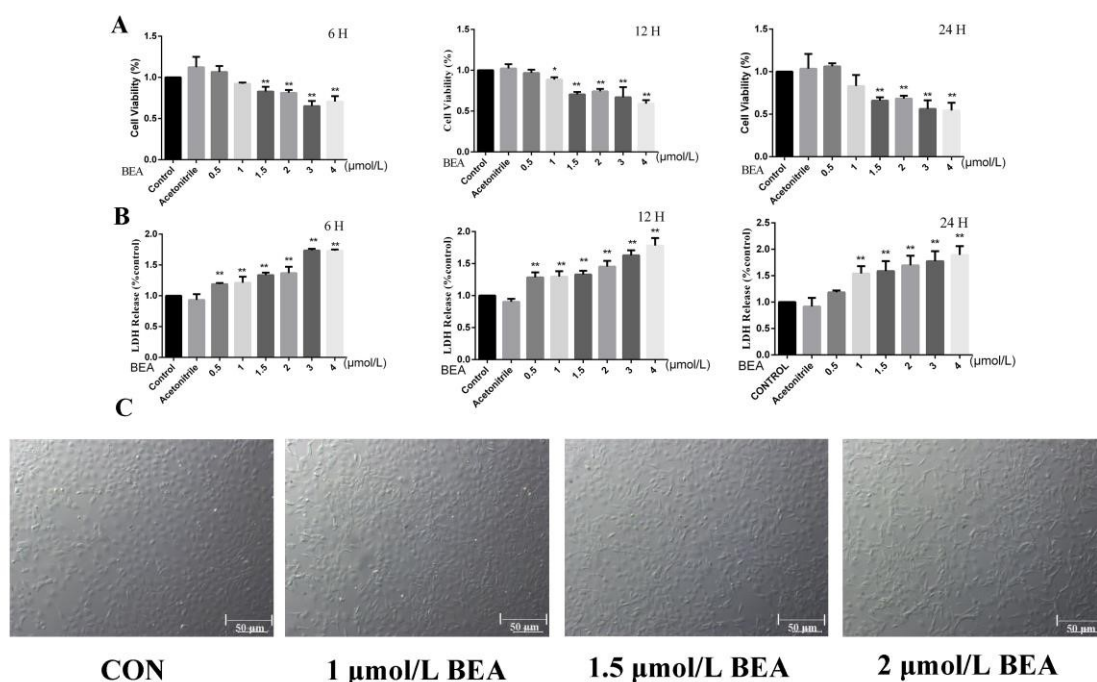

**Figure S1.** Liver cell injury induced by BEA. (A) BRL3A cells were treated with BEA at different concentrations of 0, 0.5, 1, 1.5, 2, 3, and 4 μmol/L for 6, 12 and 24 h. The acetonitrile group was added to determine whether the solvent was cytotoxic. CCK8 method was used to detect the effect of BEA on the viability of BRL3A cells. (B) The release of LDH was measured by LDH release assay kit to discover BEA-induced cytotoxicity. All experiments were performed in triplicate (n=3) and data were presented as the means ± SD and analyzed by one-way ANOVA. \*  $p < 0.05$  and \*\*  $p < 0.01$ , compared with the blank control group (CON). (C) Morphology of BRL3A cells after exposure to 0, 1, 1.5 and 2 μmol/L BEA for 12 h were observed using an optical microscope. Scale bar = 50 μm.

**Table S1.** The primary and secondary antibodies used in the present study.

| Antibody name     | Dilution ratio | Manufacturers                                      |
|-------------------|----------------|----------------------------------------------------|
| Bax               | 1:1000         | Abcam (Waltham, MA, USA)                           |
| Bcl-2             | 1:1000         | Abcam (Waltham, MA, USA)                           |
| Cleaved-caspase 3 | 1:1000         | Proteintech Group, Inc (Wuhan, China)              |
| Cleaved-caspase 9 | 1:1000         | Proteintech Group, Inc (Wuhan, China)              |
| Nrf2              | 1:1000         | Cell Signaling Technology (Beverly, MA, USA)       |
| Keap 1            | 1:1000         | Santa Cruz Biotechnology, Inc (Dallas, Texas, USA) |
| NQO1              | 1:1000         | Abclonal Technology (Wuhan, China)                 |
| HO-1              | 1:1000         | Cell Signaling Technology (Beverly, MA, USA)       |
| GST               | 1:1000         | Cell Signaling Technology (Beverly, MA, USA)       |
| p62               | 1:1000         | Abclonal Technology (Wuhan, China)                 |

|                                          |         |                                                  |
|------------------------------------------|---------|--------------------------------------------------|
| Beclin1                                  | 1:1000  | Cell Signaling Technology (Beverly, MA, USA)     |
| ATG5                                     | 1:1000  | Abcam (Waltham, MA, USA)                         |
| LC3                                      | 1:1000  | Abclonal Technology (Wuhan, China)               |
| Histone H3                               | 1:2000  | Cell Signaling Technology (Beverly, MA, USA)     |
| GAPDH                                    | 1:20000 | Proteintech Group, Inc (Wuhan, China)            |
| $\beta$ -actin                           | 1:5000  | Proteintech Group, Inc (Wuhan, China)            |
| Peroxidase conjugated secondary antibody | 1:10000 | Jackson ImmunoResearch Inc (Langcaster, PA, USA) |

**Table S2.** Sequence of primers for real-time RT-PCR amplification.

| Primer<br>s                     | Primer Sequences                                                                         | Product<br>Length (bp) |
|---------------------------------|------------------------------------------------------------------------------------------|------------------------|
| <i>NQO1</i>                     | Forward: 5'- CAGACCTGGTGATATTTTCAGTTCC -3'<br>Reverse: 5'- CACCCTGCAGAGAGTACATGG -3      | 107                    |
| <i>HO-1</i>                     | Forward: 5'- GAGCCAGCCTGAACTAGC -3'<br>Reverse: 5'- GATGTGCACCTCCTTGGT -3'               | 198                    |
| <i>SOD</i>                      | Forward: 5'- ATTCACCTTCGAGCAGAAGGCA -3'<br>Reverse: 5'- TGAGGTCCTGCAGTGGTACA -3'         | 137                    |
| <i>GST</i>                      | Forward: 5'- AGCTATGCCACCGTACACC -3' Reverse:<br>5'- GAGCTGCCCATACAGACAAGTG -3'          | 163                    |
| <i>Beclin 1</i>                 | Forward: 5'- TCGGGGCCTAAAGAATGGAG -3'<br>Reverse: 5'- GCCTGGGCTGTGGTAAGTAA -3'           | 166                    |
| <i>P62</i>                      | Forward: 5'- TTTCTCGGATGAAGGCGGCT -3'<br>Reverse: 5'- ACAAGGGAGGTGGGTTGTGG -3'           | 147                    |
| <i>LC3 B</i>                    | Forward: 5'- AAGCCAACACAGCCACCTCT -3'<br>Reverse: 5'- CTTCCCGACCGCACCATAGT -3'           | 174                    |
| <i><math>\beta</math>-actin</i> | Forward: 5'- TCACCCACACTGTGCCCATCTATGA -3'<br>Reverse: 5'- CATCGGAACCGCTCATTGCCGATAG -3' | 295                    |

Sequence of primers for real-time RT-PCR amplification.

**Table S3.** Procedures of real-time qRT-PCR amplification.

| Procedure        | Temperature | Time   | Cycle number |
|------------------|-------------|--------|--------------|
| Pre-denaturation | 95 °C       | 5 min  | 1            |
| Denaturation     | 95 °C       | 10 sec |              |
| Annealing        | 55–60 °C    | 20 sec | 40           |
| Extension        | 72 °C       | 20 sec |              |

Procedures of real-time qRT-PCR amplification.
